# Supplementary material for: The influence of hydrogen bonding on the dielectric constant and the piezoelectric energy harvesting performance of hydrated metal salt mediated PVDF films
Source: Royal Society of Chemistry journal article supplement (doi:10.1039/c5cp01820j), 2015-01-01
Supplement: c5cp01820j1.pdf [file c5cp01820j1.pdf]

Electronic Supplementary Information

**The Influence of Hydrogen Bonding on Dielectric Constant and Piezoelectric  
Energy Harvesting Performance of Hydrated Metal Salt Mediated PVDF  
Films**

Santanu Jana,<sup>a,b</sup> Samiran Garain,<sup>a</sup> Shrabanee Sen,<sup>c</sup> and Dipankar Mandal<sup>a,\*</sup>

<sup>a</sup>*Organic Nano-Piezoelectric Device Laboratory, Department of Physics, Jadavpur University  
Kolkata 700032, India*

<sup>b</sup>*Department of Electronics, Netaji Nagar Day College, 170/436 N. S. C Bose Road, Kolkata  
700092, India*

<sup>c</sup>*Central Glass and Ceramic Research Institute (CSIR), 188 Raja S C Mullick Road, Kolkata  
700032, India*

Concerning the coordination site, DMF has two possible ligands, i.e., oxygen in the C=O and nitrogen in the C-N bond. Young *et. al.* discussed the donor number (DN) and acceptor number (AN) as a measure of the basicity and acidity of a solvent, respectively, to describe the strength of interactions between metal and non-aqueous solvent molecules [33]. Since DMF has DN and AN values (DN = 24.0, AN = 16.016) similar to those of pyridine (DN = 33.1, AN = 14.2) that has been generally known as one of the best donors, DMF is likely to behave as a strong donor.

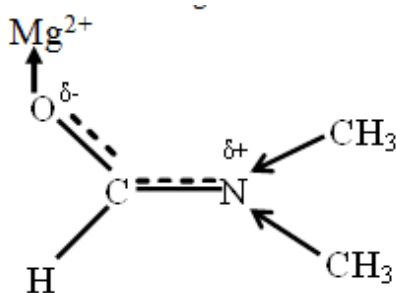

**Fig. S1.** Resonance Structure of DMF in the  $Mg^{2+}$

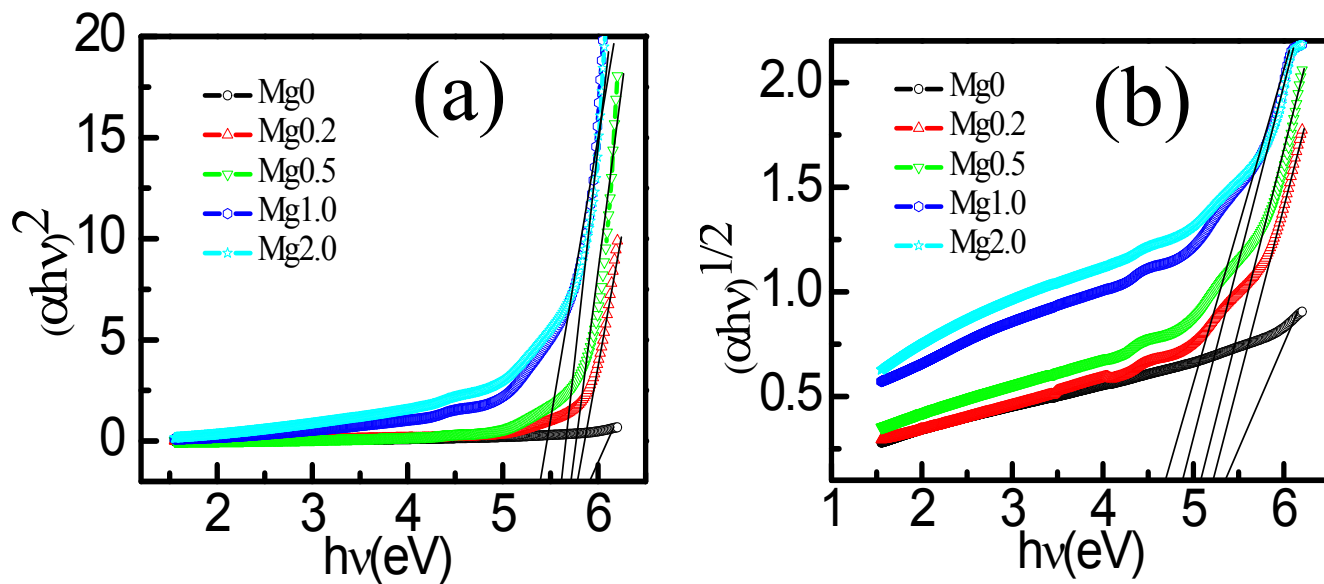

**Fig. S2.** Energy band gap for (a) direct transition and (b) indirect transition of  $Mg\#$  (where # stands for 0, 0.2, 0.5, 1.0, 2.0) filler films.

**Table 1** Variation of optical band gap of Mg# (where, #: 0.2, 0.5, 1.0, 2.0) filler films.

| Concentration<br>(Mg-salt filler) | Band gap (eV) |          |
|-----------------------------------|---------------|----------|
|                                   | Direct        | Indirect |
| 0.2                               | 5.78          | 5.22     |
| 0.5                               | 5.69          | 5.00     |
| 1.0                               | 5.59          | 4.84     |
| 2.0                               | 5.32          | 4.62     |

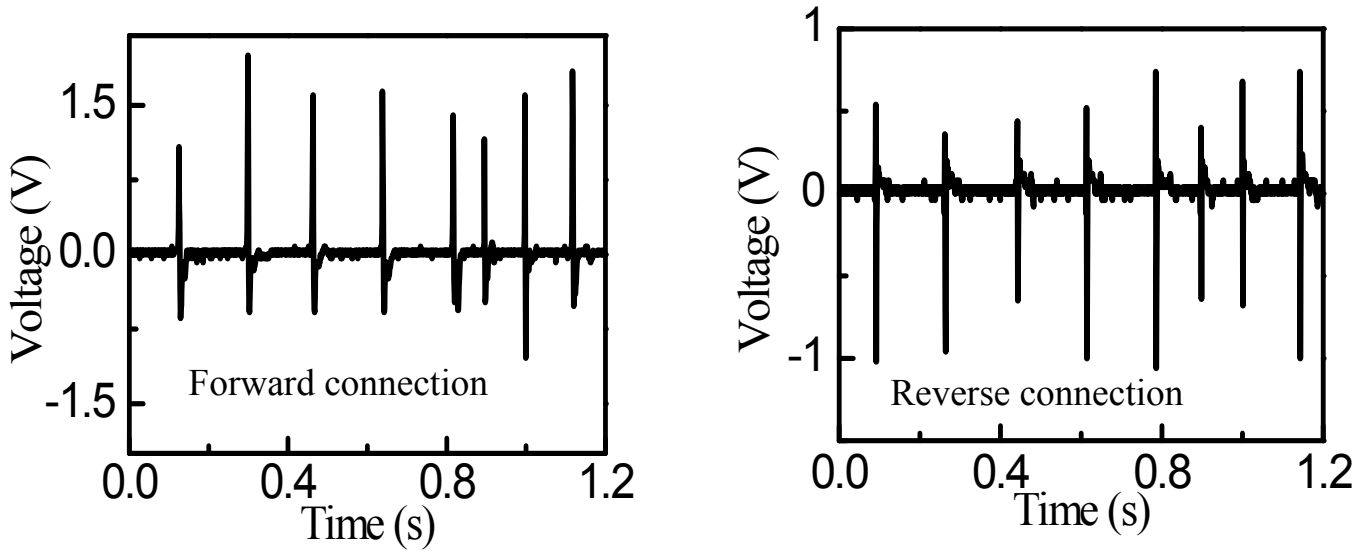

**Fig. S3.** Output open circuit voltage of MG0.2 film under (a) forward connection and (b) reverse connection mode.

### (P1) Input pressure ( $\sigma$ ) calculation

When the finger contact on the film, there exist two processes (a) initially touching the surface of the film, and (b) completely acting on the film.<sup>2,3</sup> The descending velocity of the object increases to maximum value in the first process and decreases to zero in the second one. Therefore, based on the kinetic energy theorem and momentum theorem, we have

$$m \cdot g \cdot h = \left(\frac{1}{2}\right) \cdot m \cdot v^2$$

$$(F - m \cdot g) \cdot \Delta t = m \cdot v$$

$$\sigma = F/S$$

Where  $m$  is the mass of the object,  $h$  is the falling height,  $v$  is the maximum falling velocity,  $\sigma$  is the contact pressure,  $F$  is the contact force,  $S$  is the contact area, and  $\Delta t$  is the time spanning during second process.

Here,  $S = 720 \text{ mm}^2$  is the electrode area of the PEH,  $m = 0.2 \text{ kg}$  is measured by using a laboratory balance,  $\Delta t = 0.2 \text{ sec}$  is the estimated average time variation between the two consecutive voltage peaks,  $h = 0.08 \text{ m}$  and  $g = 9.8 \text{ N/kg}$ .

Therefore, these values evaluates the input force,  $F \sim 3.21 \text{ N}$  which leads to the contact pressure,  $\sigma \sim 4.45 \text{ kPa}$ .

### REFERENCES

- (1) Y. J. Kim, and C. R. Park, *Inorg. Chem.*, 2002, **41**, 6211–6216.
- (2) C. Hou, T. Huang, H. Wang, H. Yu, Q. Zhang, and Y. Li, *Sci. Rep.*, 2013, **13**, 1–6
- (3) M. Md. Alam, S. K. Ghosh, A. Sultana, and D. Mandal, *Nanotechnology*. Accepted for Publication on 04/03/2015
